# Supplementary material for: From accent to content: the effect of Spanish accents on message credibility
Source: Frontiers journal article supplement (doi:10.3389/fcomm.2024.1497131), 2025-01-06
Supplement: Data_Sheet_1.docx [file Data_Sheet_1.docx]

**APPENDICES**

*Appendix A: Cover story (in Spanish) presented during instructions:*

Gracias por participar en este estudio.
El objetivo es medir la credibilidad de las llamadas "fake news" (noticias falsas).
Escucharás a locutores de radio de Gran Canaria y Madrid presentando una serie de noticias breves, algunas de las cuales son auténticas y otras son falsas. Después de escuchar cada noticia, deberás indicar hasta qué punto te parece auténtica en una escala del 0 al 5, donde 0 es "totalmente falsa" y 5 es "totalmente auténtica".

Por favor, proporciona tu impresión honesta sobre las noticias sin intentar utilizar estrategias para descubrir cuáles son falsas. El propósito no es adivinar correctamente, sino analizar qué tan creíbles resultan las noticias falsas para el público en general que no sabe que lo que escucha podría no ser verdadero.

Recuerda que hay tres pasos para cada noticia que escuches:

- Primero, verás una pantalla con una nota musical en el centro y escucharás la noticia.
- Cuando termine la noticia, aparecerá otra pantalla con una escala del 0 al 5 para que indiques la credibilidad de la noticia, donde 0 es "totalmente falsa" y 5 es "totalmente auténtica".
- Finalmente, se te hará una pregunta sobre el contenido de lo que escuchaste, y se te darán tres posibles respuestas para elegir. Haz clic en la respuesta correcta. El propósito de esta pregunta es verificar que prestaste atención y comprendiste la noticia.

Una vez que hayas respondido, pasarás al audio de la siguiente noticia.

*Appendix B: News item scripts (in Spanish) that were recorded for stimuli in the study, and the questions following the news items with their correct answers.*

**NOTICIA 1:**

El pasado 7 de agosto, un incendio se declaró en un edificio del centro histórico de Valladolid.

A las 8.30 de la mañana, el fuego, que se propagó por los pisos superiores, fue extinguido rápidamente por los bomberos. La mala conexión eléctrica de una lavadora estuvo detrás de este suceso.

Tras dos días fuera de sus hogares, los vecinos pudieron regresar al edificio, que ha tenido que ser reforzado.

**PREGUNTA 1:**

**¿Qué estuvo detrás del incendio que se menciona en la noticia que acaba de escuchar?**

**a) La mala conexión eléctrica de una lavadora. [correct]**

**b) La mala conexión eléctrica de un calefactor.**

**c) La mala conexión eléctrica de una lámpara.**

**NOTICIA 2:**

El pasado 8 de abril, un caniche se convirtió en el héroe del barrio de Gracia en Barcelona.

A las 16.30 de la tarde, el perro trató de llamar la atención de varias familias en un parque infantil. Este los dirigió a una zona en la que se encontraba un niño atrapado en un tobogán.

Tras un rápido rescate, los padres encontraron a su hijo ileso junto al animal.

**PREGUNTA 2:**

**¿Qué animal protagoniza la noticia que acaba de escuchar?**

**a) un gato.**

**b) un perro. [correct]**

**c) un loro.**

**NOTICIA 3:**

En 2020, la Universidad Internacional de Guatemala fue clasificada entre las 500 mejores universidades del mundo.

Esta universidad ocupó el puesto 205 en el ranking mundial publicado por la Revista Internacional de Universidades. La revista utilizó diferentes criterios basados en la investigación y la innovación.

A raíz de esta publicación, la tasa de matriculación ha aumentado de forma significativa.

**PREGUNTA 3:**

**¿Qué Universidad Internacional fue clasificada entre las 500 mejores Universidades del mundo, según la noticia que acaba de escuchar?**

**a) La Universidad Internacional de Valencia.**

**b) La Universidad Internacional de Guatemala. [correct]**

**c) La Universidad Internacional de Barcelona.**

**NOTICIA 4:**

En el curso 2021/2022, la tasa de éxito de los exámenes de bachillerato en Cáceres aumentó de forma significativa.

El lunes, el Ministerio de Educación anunció los buenos resultados académicos en la ciudad extremeña. Además, la tasa de éxito de las mujeres constituyó un mayor porcentaje del total de aspirantes.

Esto ha supuesto que casi el total de los postulantes haya podido acceder al grado y universidad elegidos.

**PREGUNTA 4:**

**¿Quién obtuvo una mayor tasa de éxito en los exámenes de bachillerato, según se menciona en la noticia que acaba de escuchar?**

**a) Los hombres.**

**b) Las mujeres. [correct]**

**c) Ambos.**

**NOTICIA 5:**

El pasado 14 de noviembre, una mujer fue detenida por drogar a su marido para manipular sus cuentas.

La mujer de 56 años introdujo un narcótico en un filete que iba a consumir su marido. El suceso se produjo en el domicilio de esta, donde habían quedado para hablar de su separación matrimonial.

La Policía Nacional se hizo cargo de la investigación, que culminó con su detención.

**PREGUNTA 5:**

**¿Qué parentesco tiene la persona detenida con la víctima en la noticia que acaba de escuchar?**

**a) Hermana.**

**b) Mujer. [correct]**

**c) Prima.**

**NOTICIA 6:**

El pasado lunes, un trabajador murió tras derrumbarse un andamio en el que se encontraba trabajando.

Según las primeras investigaciones, el trabajador fallecido llevaba puesto el arnés de seguridad en el momento del siniestro. Otro trabajador que se encontraba debajo del andamio fue arrastrado y se encuentra en estado crítico.

Las investigaciones se centran ahora en la inspección de los anclajes del andamio.

**PREGUNTA 6:**

**¿Llevaba puesto el arnés de seguridad el trabajador fallecido, según la noticia que acaba de escuchar?**

**a) Si. [correct]**

**b) No.**

**c) No se hace referencia a ningún arnés.**

**NOTICIA 7:**

El 25 de octubre, un terremoto causó la muerte de docenas de personas en China.

Con una magnitud de 5,6, el terremoto ha dejado además cientos de heridos. Los daños causados han impedido que muchos afectados pudiesen acceder al hospital principal de la zona.

La policía ha informado de que cerca de 26 personas han muerto, cifra que se teme que incrementará en los próximos días.

**PREGUNTA 7:**

**¿En el sur de que país tuvo lugar la noticia que acaba de escuchar?**

**a) Vietnam.**

**b) Japón.**

**c) China. [correct]**

**NOTICIA 8:**

El pasado mes de noviembre, un autobús con 8 pasajeros se salió de la carretera y volcó en un barranco.

Un autobús acabó volcado sobre una zona rocosa de difícil acceso en Valencia. Al parecer, el conductor perdió el control del vehículo en una curva y acabó cayendo por un barranco.

Las personas que viajaban en el vehículo se encuentran ingresadas en un hospital, pero sus vidas no corren peligro.

**PREGUNTA 8:**

**¿Cuántas personas viajaban en el vehículo que se menciona en la noticia que acaba de escuchar?**

**a) 8. [correct]**

**b) 10.**

**c) 7.**

**NOTICIA 9:**

El pasado lunes, un kamikaze circuló en dirección contraria durante más de quince minutos en Mallorca.

El hecho ocurrió durante la noche y ante la atenta mirada de los vecinos que se lo iban encontrando. El acto fue grabado por varios jóvenes que se cruzaron con el imprudente.

El vídeo, que fue subido a redes sociales y cuenta con miles de reproducciones, provocó la detención inmediata del conductor.

**PREGUNTA 9:**

**¿Durante cuánto tiempo circulaba en dirección contraria el kamikaze al que se hace referencia en la noticia que acaba de escuchar?**

**a) Durante más de 5 minutos.**

**b) Durante más de 15 minutos. [correct]**

**c) Durante más de 10 minutos.**

**NOTICIA 10:**

El pasado 15 de abril, fuertes lluvias provocaron una decena de intervenciones en Galicia.

Los bomberos tuvieron que solventar una decena de incidencias a causa de la intensa lluvia y fuertes rachas de viento. Como es habitual en primavera, la zona más afectada fue la periferia de la capital.

El temporal dejó varios postes telefónicos y árboles caídos, así como enormes piedras en medio de la calzada.

**PREGUNTA 10:**

**¿En qué Comunidad Autónoma tiene lugar la noticia que acaba de escuchar?**

**a) Galicia. [correct]**

**b) Madrid.**

**c) Asturias.**

**NOTICIA 11:**

El pasado martes, el Ayuntamiento de Sevilla pidió una solución a la Delegación Territorial de Educación.

El Ayuntamiento reclama soluciones urgentes ante la falta de profesionales en el Servicio de Atención a la Diversidad. Madres y padres se unieron a esta petición, realizando una concentración a las puertas de la Delegación educativa.

La Delegada se ha comprometido públicamente a actuar frente a dicha problemática.

**PREGUNTA 11:**

**¿En qué ciudad española tiene lugar la noticia que acaba de escuchar?**

**a) Madrid.**

**b) Sevilla. [correct]**

**c) Valencia.**

**NOTICIA 12:**

El pasado martes, unos piratas informáticos cometieron un ataque cibernético en el Ministerio del Interior.

Piratas informáticos realizaron un ciberataque a la Secretaría de Estado de Seguridad. Según la información recibida, fue un trabajador de la planta 10 quien habría dado la voz de alarma.

El trabajador avisó a los técnicos informáticos, quienes eliminaron el *software* para recuperar el control del ordenador.

**PREGUNTA 12:**

**¿Dónde se cometió el ataque cibernético que se menciona en la noticia que acaba de escuchar?**

**a) Ministerio del Interior. [correct]**

**b) Ministerio de Asuntos Exteriores**

**c) Ministerio de Justicia**

**NOTICIA 13:**

El pasado 15 de enero, fueron halladas 30 estatuas en las Antiguas termas de la provincia de Roma.

Las 30 esculturas, que aparecieron con diez mil monedas de oro, se encuentran en perfecto estado. Este hallazgo ha sido considerado uno de los más significativos de la historia antigua.

El descubrimiento se ha convertido en el mayor depósito de estatuas de bronce.

**PREGUNTA 13:**

**¿En qué ciudad italiana fueron halladas 15 estatuas de bronce, según la noticia que acaba de escuchar?**

**a) Roma. [correct]**

**b) Nápoles.**

**c) Florencia.**

**NOTICIA 14:**

El pasado mes de abril se inauguró uno de los hoteles más lujosos de Berlín.

La antigua penitenciaría para mujeres, creada para crímenes políticos durante la Segunda Guerra Mundial, se ha convertido ahora en un hotel de lujo con todo tipo de comodidades.

La esperada apertura de este hotel ha generado largas colas a lo largo de la calle en la que se ubica.

**PREGUNTA 14:**

**¿En qué se convirtió la antigua penitenciaría a la que se hace referencia en la noticia que acaba de escuchar?**

**a) En un restaurante.**

**b) En un centro comercial.**

**c) En un hotel de lujo. [correct]**

**NOTICIA 15:**

El pasado miércoles, unos investigadores hallaron huevos de dinosaurio en China.

Un equipo de investigadores encontró nidos fosilizados con huevos de dinosaurio que datan de millones de años. Destaca la gran importancia del hallazgo para la investigación de ese periodo prehistórico.

Tras analizar los huevos, los científicos determinaron que se trata de fósiles de un tipo muy raro y específico.

**PREGUNTA 15:**

**¿En qué país fueron encontrados huevos de dinosaurio de hace millones de años, según la noticia que acaba de escuchar?**

**a) Japón.**

**b) Rusia.**

**c) China. [correct]**

**NOTICIA 16:**

El pasado noviembre, un médico fue amenazado por un paciente al grito de “te voy a matar”.

El doctor de un centro de salud en Cantabria sufrió una agresión por parte de un paciente al que negó la medicación que pedía.

El investigado, de 27 años y con antecedentes penales, fue puesto en libertad provisional.

**PREGUNTA 16:**

**¿En qué Comunidad Autónoma tiene lugar la noticia que acaba de escuchar?**

**a) Castilla y León.**

**b) La Rioja.**

**c) Cantabria. [correct]**

**NOTICIA 17:**

En septiembre, la Universidad Internacional de Valencia publicó un estudio que muestra que los fetos pueden reaccionar a los sabores.

El equipo de investigadores realizó diferentes ecografías a embarazadas para analizar las reacciones de los fetos. En estas se observó cómo reaccionaban los fetos a los diferentes sabores.

Los resultados obtenidos amplían nuestra comprensión del desarrollo de los receptores gustativos y olfativos humanos.

**PREGUNTA 17:**

**¿Qué Universidad Internacional publicó el estudio que se menciona en la noticia que acaba de escuchar?**

**a) Universidad Internacional de Valencia. [correct]**

**b) Universidad Internacional de Guatemala.**

**c) Universidad Internacional de Barcelona.**

**NOTICIA 18:**

El pasado lunes, tuvo lugar un atropello múltiple en el municipio alicantino de San Juan.

Al menos once personas han resultado heridas tras ser arrolladas por un coche en Alicante. El vehículo, que irrumpió en medio de un concierto, ha dejado una docena de heridos.

Entre los heridos, hay cinco personas en estado grave, una de ellas es un menor de edad.

**PREGUNTA 18:**

**¿En medio de qué acto se produjo el atropello múltiple que se menciona en la noticia que acaba de escuchar?**

**a) En medio de un concierto. [correct]**

**b) En medio de una verbena.**

**c) En medio de una actuación teatral.**

**NOTICIA 19:**

El pasado mes de enero se alcanzó una cifra récord en ingresos psiquiátricos de chicas adolescentes en Almería.

En los juzgados de Familia de esta ciudad, se tramitan cada semana entre ocho y diez internamientos de jóvenes. El “efecto confinamiento” ha supuesto que los ingresos psiquiátricos hayan tenido un incremento sustancial desde la pandemia.

Esto ha significado un aumento en la demanda de profesional sanitario especializado.

**PREGUNTA 19:**

**¿Cuántos internamientos semanales se tramitan en los Juzgados de Familia de Madrid?**

**a) Entre ocho y diez. [correct]**

**b) Entre siete y ocho.**

**c) Menos de cinco.**

**NOTICIA 20:**

El pasado 3 octubre, fue detenida una mujer por la muerte a cuchilladas de un hombre en Granada.

La Policía Nacional detuvo a una mujer de 45 años como presunta autora de la muerte a cuchilladas de su pareja de 32. Los hechos ocurrieron en la vivienda de ambos ubicada en Granada.

Se desconoce más información sobre la identidad de la víctima, así como de la mujer.

**PREGUNTA 20:**

**¿En qué ciudad española tiene lugar la noticia que acaba de escuchar?**

**a) Sevilla.**

**b) Málaga.**

**c) Granada. [correct]**

**NOTICIA 21:**

El 25 de noviembre, un osezno volvió a su medio natural tras permanecer un mes en un centro de rehabilitación.

El osezno, que se recuperó de las heridas causadas por un cazador, fue trasladado al bosque donde le habían encontrado.

La vuelta a la naturaleza se está haciendo de manera progresiva, bajo la atenta mirada de veterinarios especializados en fauna salvaje.

**PREGUNTA 21:**

**¿Qué animal es el protagonista de la noticia que acaba de escuchar?**

**a) Un jabalí.**

**b) Un osezno. [correct]**

**c) Un ciervo.**

**NOTICIA 22:**

En noviembre, un policía local salvó a una bañista en una playa de Menorca.

Para salvarle la vida a la mujer, el policía no dudó en quitarse el uniforme y meterse al mar. Junto a él, otro ciudadano que se encontraba cerca ayudó en el rescate.

Con la ayuda de ambos y el salvavidas de rescate, se logró sacar a la bañista del agua sin lamentar daños físicos.

**PREGUNTA 22:**

**¿En qué isla balear tuvo lugar el suceso que se menciona en la noticia que acaba de escuchar?**

**a) Palma de Mallorca.**

**b) Menorca. [correct]**

**c) Formentera.**

**NOTICIA 23:**

El mes pasado, un grupo de investigadores halló una molécula clave en el desarrollo de la leucemia.

Investigadores del Instituto de Biomedicina de la Universidad de Barcelona descubrieron una nueva molécula. La partícula, implicada en la activación de procesos genéticos, puede originar leucemia si no funciona correctamente.

Este descubriendo ha supuesto un gran impacto en el mundo científico.

**PREGUNTA 23:**

**¿En qué universidad se descubrió la molécula que se menciona en la noticia que acaba de escuchar?**

**a) La Universidad Complutense de Madrid.**

**b) La Universidad de Barcelona. [correct]**

**c) La Universidad Internacional de Valencia.**

**NOTICIA 24:**

El pasado lunes, un delfín varado fue encontrado en uno de los charcos de un municipio de Palma de Mallorca.

Los vecinos de Santa Eugenia amanecieron con esta trágica estampa en la mañana del lunes. Según el veterinario que examinó al animal, todo apunta a que pudo desorientarse y acabar en la orilla.

Como consecuencia, se ha incrementado la presencia de guardia costera en la zona noroeste de la isla.

**PREGUNTA 24:**

**¿Qué animal fue encontrado varado en un municipio de Palma de Mallorca, según la noticia que acaba de escuchar?**

**a) Una ballena.**

**b) Un delfín. [correct]**

**c) Un tiburón.**

**NOTICIA 25:**

El pasado sábado, una localidad en Granada batió un récord Guinness.

Se ha logrado el récord Guinness de la tosta ibérica más grande del mundo en Granada. La tosta está elaborada con un buen pan, aceite de oliva y con productos ibéricos.

Muchos vecinos y visitantes degustaron la gran tosta de manera gratuita, después de que el notario diese fe y certificara la validez de la misma.

**PREGUNTA 25:**

**¿Qué comida ganó un récord Guinness en una localidad granadina, según la noticia que acaba de escuchar?**

**a) Una tosta ibérica. [correct]**

**b) Una paella.**

**c) Una tortilla.**

**NOTICIA 26:**

El pasado lunes 5, la borrasca Larisa ‘barrió’ la península y batió récords históricos en España.

La borrasca presentó rachas de viento de más de 120 kilómetros por hora. La Agencia Estatal de Meteorología ha declarado la alerta por temporal en todo el país, salvo Andalucía.

A pesar de la fuerza del viento, no se han producido incidentes relevantes.

**PREGUNTA 26:**

**¿Qué Comunidad Autónoma no estaban en alerta de la Agencia Estatal de Meteorología, según la noticia que acaba de escuchar?**

**a) Andalucía [correct]**

**b) Cataluña**

**c) Galicia**

**NOTICIA 27:**

El pasado mes de noviembre, se detuvo a un falso médico en un municipio de Pontevedra.

La Guardia Civil arrestó a un hombre de 60 años acusado de delitos de falsedad en documento oficial e intrusismo profesional. El detenido ya tenía antecedentes penales por hechos similares en otras Comunidades Autónomas.

Por el momento, ha quedado en libertad provisional a la espera del juicio.

**PREGUNTA 27:**

**¿En qué municipio fue detenida la persona que se menciona en la noticia que acaba de escuchar?**

**a) Córdoba.**

**b) Pontevedra. [correct]**

**c) Cartagena.**

**NOTICIA 28:**

El pasado miércoles, el Cementerio de Cantabria recibió el premio a la mejor iniciativa medioambiental del Estado.

Este Cementerio municipal ha ganado el primer premio en el Concurso de Cementerios de España 2022. El fallo ha valorado que está alineado con la Estrategia Ambiental para cumplir el reto frente al Cambio Climático.

Como respuesta a este premio, el Cementerio de Bilbao ya está preparándose para competir en otra categoría.

**PREGUNTA 28:**

**¿Qué Cementerio ha ganado el primer premio en el Concurso de Cementerios de España 2022, según la noticia que acaba de escuchar?**

**a) El Cementerio municipal de Andalucía.**

**b) El Cementerio municipal de Cataluña.**

**c) El Cementerio municipal de Cantabria. [correct]**

**NOTICIA 29:**

En diciembre, un grupo de investigadores descubrió que se tenía mejor salud bucal en el paleolítico.

El sarro fijado a dientes de humanos de la prehistoria ha permitido saber qué comían, qué bacterias tenían en la boca y, también, cómo era su salud bucal.

Por otro lado, los resultados señalan que las enfermedades orales eran más comunes en el Neolítico que en el Paleolítico.

**PREGUNTA 29:**

**¿Qué área de la salud se investigó en el estudio que acaba de escuchar?**

**a) Salud mental.**

**b) Salud ginecológica.**

**c) Salud bucal. [correct]**

**NOTICIA 30:**

El pasado lunes se detuvo a un hombre por matar a su pareja y a la hija de esta.

En el domicilio de ambos se encontraban los cuerpos sin vida de la mujer y de su hija. Junto a ellas, se encontraba malherido el presunto autor de los hechos tras intentar suicidarse.

El supuesto responsable fue atendido y trasladado al hospital de Jérez. Actualmente, se encuentra fuera de peligro.

**PREGUNTA 30:**

**¿Quién es el presunto asesino de una mujer y de su hija, según la noticia que acaba de escuchar?**

**a) Su hermano.**

**b) Su pareja. [correct]**

**c) Un amigo de la familia.**

**NOTICIA 31:**

La semana pasada tuvo lugar una formación de elaboración de quesos en Galicia.

El Ayuntamiento de Vigo impartió este lunes una formación para la elaboración de quesos de leche de cabra. La finalidad de este curso es mejorar las competencias generales en ganadería de los llamados “nuevos ganaderos”.

Esta acción formativa está dentro de la programación de cursos que imparte la Consejería de Agricultura, Ganadería y Pesca.

**PREGUNTA 31:**

**¿En qué Comunidad Autónoma tiene lugar la noticia que acaba de escuchar?**

**a) Galicia. [correct]**

**b) Cantabria.**

**c) País Vasco.**

**NOTICIA 32:**

El pasado diciembre, se inició la excavación de una fosa común donde fueron enterrados 7 hombres gallegos.

El lugar donde fueron enterrados permaneció ignorado hasta que el Comité de Memoria Histórica hizo públicas las actas de guerra. La Universidad de Pontevedra coordinará las excavaciones para proceder a la exhumación.

Esto ha provocado que comiencen las excavaciones en otras fosas comunes en las que se cree hay más personas enterradas.

**PREGUNTA 32:**

**¿Cuántos hombres gallegos fueron enterrados en una fosa común, según la noticia que acaba de escuchar?**

**a) 7. [correct]**

**b) 10.**

**c) 5.**

**NOTICIA 33:**

Este jueves, un hombre ha resultado herido al caerle una losa de una fachada en Barcelona.

El hombre de 35 años se encuentra en estado grave, mientras que su mujer ha tenido que ser atendida por los psicólogos. El tráfico ha sido regulado por la Policía Municipal poco después del accidente.

La víctima fue trasladada al Hospital con un traumatismo craneoencefálico severo.

**PREGUNTA 33:**

**¿Qué le cayó al protagonista de la noticia que acaba de escuchar?**

**a) Un macetero.**

**b) Una losa. [correct]**

**c) Una piedra de la fachada.**

**NOTICIA 34:**

El viernes, un perro de la Guardia Civil descubrió a una mujer pasando droga en una cárcel de Sevilla.

Los hechos ocurrieron cuando el animal señaló a una mujer que iba a encontrarse con su hijo preso. A la llegada de los agentes, la sospechosa reconoció que portaba diversas drogas ocultas en su cuerpo.

La mujer fue detenida bajo la acusación de un delito contra la salud pública.

**PREGUNTA 34:**

**¿Quién descubrió a una mujer que pasaba droga en una cárcel de Sevilla, según la noticia que acaba de escuchar?**

**a) Un Guardia Civil.**

**b) Un perro de la Guardia Civil. [correct]**

**c) Una ciudadana.**

**NOTICIA 35:**

En 2016, una madre echa a su hija menor de casa y es ahora condenada a un año de cárcel.

La sentencia, que la condena como autora de un delito de abandono de menor, considera probado que la mujer tenía asignada la custodia.

Tras esta sentencia, la mujer continúa negando su implicación en el delito de abandono.

**PREGUNTA 35:**

**¿Por qué delito se ha condenado a una madre, según la noticia que acaba de escuchar?**

**a) Delito de abandono. [correct]**

**b) Delito de hurto.**

**c) Delito de estafa.**

**NOTICIA 36:**

El pasado mes, se contrató a un gran número de sanitarios para afrontar el aumento de bronquitis infantil en Murcia.

La Comunidad de Murcia autorizó la contratación de profesionales sanitarios para que actúen de refuerzo ante el aumento de bronquitis en la región.

Esta medida supondrá la incorporación de diferentes trabajadores de la sanidad, mejorando así la calidad de la atención sanitaria.

**PREGUNTA 36:**

**¿De qué virus se habla en la noticia que acaba de escuchar?**

**a) Bronquitis. [correct]**

**b) Gripe.**

**c) Covid-19.**

**NOTICIA 37:**

El pasado miércoles, una banda de ladrones robó millones de euros en ordenadores de la compañía HP.

Varios individuos accedieron a la nave del polígono industrial y robaron ordenadores por valor de casi dos millones de euros. Dos de los vehículos utilizados para el robo han sido recuperados por la Policía Nacional.

Todavía se desconoce la identidad de los ladrones.

**PREGUNTA 37:**

**¿De qué marca es la compañía que fue robada, según la noticia que acaba de escuchar?**

**a) Samsung.**

**b) Apple.**

**c) HP. [correct]**

**NOTICIA 38:**

El pasado marzo se abrió un centro en Jaén para ayudar a las familias en situación de necesidad.

El centro de Servicios Sociales estará a disposición de los vecinos a partir de abril, y se dividirá en dos edificios, uno de asistencia social y otro para mayores.

Se atenderá las necesidades básicas relacionadas con la autonomía, el bienestar y la vida digna.

**PREGUNTA 38:**

**¿En qué Comunidad Autónoma abrió un centro de Servicios Sociales, según la noticia que acaba de escuchar?**

**a) Jaén. [correct]**

**b) Cataluña.**

**c) Cantabria.**

**NOTICIA 39:**

El pasado 4 de abril, un rayo mató a dos bañistas en una playa del norte de Galicia.

A las 16:00 de la tarde, la Agencia Estatal de Meteorología había emitido un aviso de alerta amarilla por "tormentas muy intensas". El rayo ha caído entre bañistas que estaban en ese momento nadando.

Las víctimas, un hombre de nacionalidad italiana y un turista alemán, han fallecido en el acto.

**PREGUNTA 39:**

**¿Qué mató a dos bañistas en una playa de Galicia, según la noticia que acaba de escuchar?**

**a) Un rayo. [correct]**

**b) Un derrumbe.**

**c) Una moto acuática.**

**NOTICIA 40:**

El pasado sábado, Salvamento Marítimo rescató a un hombre que practicaba paddle surf en una playa de Santander.

Las fuertes corrientes y el potente viento hicieron que el hombre no pudiera acercarse a la orilla. Salvamento Marítimo recibió el aviso y de inmediato se inició la actuación pertinente.

Esta unidad de salvamento ha aprovechado para recordar que la práctica de deportes náuticos no está exenta de riesgos.

**PREGUNTA 40:**

**¿De qué deporte acuático se habla en la noticia que acaba de escuchar?**

**a) Surf.**

**b) Paddle surf. [correct]**

**c) Windsurf.**

*Appendix C: Cover story (in Spanish) presented during instructions:*

Thank you for participating in this study.

The objective is to measure the credibility of so-called "fake news."

You will listen to radio announcers from Gran Canaria and Madrid delivering a series of brief news stories, some of which are authentic and others are false. After listening to each news story, you will have to indicate to what extent the news seems authentic to you on a scale from 0 to 5, where 0 is "totally false" and 5 is "totally authentic."

Please provide your honest impression of the news without trying to use strategies to discover which news stories are false. The aim is not to guess correctly, but to analyze how credible fake news is to the general public who doesn't know that what they are hearing may not be true.

Remember, there are three steps for each news story you listen to:

- First, you will see a screen with a musical note in the center and you will hear the news.
- When the news ends, you will see another screen with a scale from 0 to 5 for you to indicate the credibility of the news, where 0 is "totally false" and 5 is "totally authentic."
- Finally, you will be asked a question about the content of what you heard, and you will be given three possible answers to choose from. Click on the correct one. The purpose of this question is to check that you paid attention and understood the news.

Once you have responded, you will move on to the audio of the next news story.

*Appendix D: News item scripts (in English) that were recorded for stimuli in the study, and the questions following the news items with their correct answers.*

**NEWS 1:**

On August 7th, a fire broke out in a building in the historic center of Valladolid.

At 8:30 a.m., the fire, which spread to the upper floors, was quickly extinguished by the firefighters. The incident was caused by a defective electrical connection in a washing machine.

After two days away from their homes, the neighbors were able to return to the building, which had to be reinforced.

**QUESTION 1:**

**What was behind the fire mentioned in the news you just heard?**

1. **The defective electrical connection of a washing machine. [correct]**
2. **The defective electrical connection of a radiator.**
3. **The defective electrical connection of a lamp.**

**NEWS 2:**

On April 8th, a poodle became the hero of the Gracia neighborhood in Barcelona.

At 16:30, the dog tried to get the attention of several families in a playground. It led them to an area where a child was trapped in a slide.

After a quick rescue, the parents found their child unharmed next to the dog.

**QUESTION 2:**

**What animal is the main subject of the news you just heard?**

1. **A cat.**
2. **A dog. [correct]**
3. **A parrot**

**NEWS 3:**

In 2020, the International University of Guatemala was ranked among the top 500 universities in the world.

This university ranked 205th in the global ranking published by the International Journal of Universities. The journal used various criteria based on research and innovation.

Due to this publication, the enrollment rate has increased significantly.

**QUESTION 3:**

**Which International University was ranked among the top 500 universities in the world, according to the news you just heard?**

1. **The International University of Valencia.**
2. **The International University of Guatemala. [correct]**
3. **The International University of Barcelona.**

**NEWS 4:**

In the 2021/2022 academic year, the success rate of high school exams in Caceres increased significantly.

On Monday, the Ministry of Education announced the good academic results in the Extremaduran city. Moreover, the success rate for women represented a higher percentage of the total number of candidates.

This has meant that almost all of the applicants have been able to access the chosen degree and university.

**QUESTION 4:**

**According to the news you just heard, who achieved a higher success rate in the high school exams?**

1. **Men.**
2. **Women. [correct]**
3. **Both.**

**NEWS 5:**

On November 14th, a woman was arrested for drugging her husband to manipulate his accounts.

The 56-year-old woman placed a narcotic in a steak that her husband was going to eat. The incident took place at her home, where they had arranged to meet to discuss their marital separation.

The National Police took charge of the investigation, which culminated in her arrest.

**QUESTION 5:**

**What is the relationship between the arrested person and the victim in the news you just heard?**

1. **Sister.**
2. **Wife. [correct]**
3. **Cousin**

**NEWS 6:**

Last Monday, a worker died after a scaffolding he was working on collapsed.

According to the initial investigations, the deceased worker was wearing a safety harness at the time of the incident. Another worker, who was underneath the scaffolding, was dragged and is in critical condition.

The investigations are now focused on inspecting the scaffolding’s anchors.

**QUESTION 6:**

**According to the news you just heard, was the deceased worker wearing a safety harness?**

1. **Yes. [correct]**
2. **No.**
3. **No reference is made to a harness.**

**NEWS 7:**

On October 25th, an earthquake caused the death of dozens of people in China.

With a magnitude of 5.6, the earthquake also left hundreds of injured individuals. The damage caused has prevented many affected people from accessing the main hospital in the area.

Police have reported that around 26 people have died, a number that is feared to increase in the coming days.

**QUESTION 7:**

**In the south of which country did the news you just heard take place?**

1. **Vietnam.**
2. **Japan.**
3. **China. [correct]**

**NEWS 8:**

Last November, a bus with 8 passengers went off the road and overturned in a cliff.

A bus ended up overturned on a rocky, hard-to-see area in Valencia. Apparently, the driver lost control of the vehicle on a curve and fell into a cliff.

The people who were travelling in the vehicle are hospitalized, but their lives are not in danger.

**QUESTION 8:**

**How many people were travelling in the vehicle mentioned in the news you just heard?**

1. **8. [correct].**
2. **10.**
3. **7.**

**NEWS 9:**

Last Monday, a reckless driver drove in the wrong direction for more than fifteen minutes in Mallorca.

The incident occurred during the night, with neighbors watching as they encountered him. The act was recorded by several young people who crossed paths with the reckless driver.

The video, which was uploaded to social media and has thousands of views, led to the driver’s immediate arrest.

**QUESTION 9:**

**How long did the reckless driver mentioned in the news you just heard drive in the wrong direction?**

1. **For more than 5 minutes.**
2. **For more than 15 minutes. [correct]**
3. **For more than 10 minutes.**

**NEWS 10:**

On April 15th, heavy rains caused a dozen interventions in Galicia.

Firefighters had to address several incidents due to the intense rain and strong gusts of wind. As usual in spring, the most affected area was the outskirts of the capital.

The storm left several fallen telephone poles and trees, as well as large stones in the middle of the road.

**QUESTION 10:**

**In which autonomous communities does the news you just heard take place?**

1. **Galicia. [correct]**
2. **Madrid.**
3. **Asturias.**

**NEWS 11:**

Last Tuesday, the City Council of Seville requested a solution for the Territorial Delegation of Education.

The City Council is calling for urgent solutions due to the lack of professionals in the Diversity Support Service. Mothers and fathers joined this request by holding a gathering in front of the Education Delegation.

The Delegate has publicly committed to taking action regarding the issue.

**QUESTION 11:**

**In which city does the news you just heard take place?**

1. **Madrid.**
2. **Sevilla. [correct]**
3. **Valencia.**

**NEWS 12:**

Last Tuesday, hackers carried out a cyberattack on the Ministry of the Interior.

Hackers launched a cyberattack on the Secretariat of State for Security. According to the information received, it was a worker on the 10th floor who raised the alarm.

This worker notified the IT technicians, who removed the software to regain control of the computer.

**QUESTION 12:**

**Where did the cyberattack mentioned in the news you just heard take place?**

1. **Ministry of the Interior. [correct]**
2. **Ministry of Foreign Affairs.**
3. **Ministry of Justice.**

**NEWS 13:**

On January 15th, 30 statues were found in the Ancient Baths of the province of Rome.

The 30 sculptures, which were discovered along with ten thousand gold coins, are in perfect condition. This find has been considered one of the most significant in ancient history.

The discovery has become the largest collection of bronze statues ever found.

**QUESTION 13:**

**In which Italian city were 30 bronze statues found, according to the news you just heard?**

1. **Rome. [correct]**
2. **Naples.**
3. **Florence.**

**NEWS 14:**

Last April one of the most luxurious hotels in Berlin was opened.

The former women’s penitentiary, created for political crimes during the World War II, has now been transformed into a luxury hotel with all kinds of amenities.

The highly anticipated opening of this hotel has caused long lines along the streets where it is located.

**QUESTION 14:**

**What did the former penitentiary mentioned in the news just turn into?**

1. **In a restaurant.**
2. **In a shopping mall.**
3. **In a luxury hotel. [correct]**

**NEWS 15:**

Last Wednesday, researchers discovered dinosaur eggs in China.

A team of researchers found fossilized nests with dinosaur eggs dating back millions of years. The discovery is of great importance for research on that prehistoric period.

After analyzing the eggs, scientists determined that they are fossils of a very rare and specific type.

**QUESTION 15:**

**According to the news you just heard, in which country were these dinosaur eggs from millions of years ago found?**

1. **Japan.**
2. **Russia.**
3. **China. [correct]**

**NEWS 16:**

Last November, a doctor was threatened by a patient screaming, “I am going to kill you”.

The doctor, from a healthcare center in Cantabria, was assaulted by a patient whom he had denied the medication requested.

The 27-year-old suspect, with a criminal record, was released on provisional bail.

**QUESTION 16:**

**In which autonomous community does the news you just heard take place?**

1. **Castile and Leon**
2. **La Rioja**
3. **Cantabria**

**NEWS 17:**

In September, the International University of Valencia published a study showing that fetuses can react to flavors.

The research team conducted various ultrasounds on pregnant women to analyze fetuses’ reactions to different flavors.

The results obtained expand our understanding of the development of human taste and smell receptors.

**QUESTION 17:**

**Which International University published the study mentioned in the news you just heard?**

1. **International University of Valencia. [correct]**
2. **International University of Guatemala.**
3. **International University of Barcelona.**

**NEWS 18:**

Last Monday, a multiple hit-and-run occurred in the Alicante municipality of San Juan.

At least eleven people were injured after being struck by a car in Alicante. The vehicle, which crashed into a concert, left a dozen people injured.

Among the injured, five are in serious condition, one of them is a minor.

**QUESTION 18:**

**What event was taking place when the multiple hit-and-run mentioned in the news you just heard occurred?**

1. **In the middle of a concert. [correct]**
2. **In the middle of an open-air dance.**
3. **In the middle of theatrical performance.**

**NEWS 19:**

Last January, a record number of psychiatric admissions of teenage girls was reached in Almeria.

In the Family Court of the city, between eight and ten youth admissions are processed each week. The “lockdown effect” has led to a substantial increase in psychiatric admissions since the pandemic.

This has resulted in a higher demand for specialized healthcare professionals.

**QUESTION 19:**

**How many weekly admissions are processed in the Family Courts of Madrid?**

1. **Between eight and ten. [correct]**
2. **Between seven and eight.**
3. **Less than five.**

**NEWS 20:**

On October 3rd, a woman was arrested for the stabbing death of a man in Granada.

The National Police arrested a 45-year-old woman as the suspected perpetrator of the stabbing death of her 32-year-old partner. The incident occurred in their shared home in Granada.

Further information regarding the identity of the victim and the woman is unknown.

**QUESTION 20:**

**In which Spanish city did the new you just heard take place?**

1. **Seville.**
2. **Malaga.**
3. **Granada. [correct]**

**NEWS 21:**

On November 25th, a bear cub returned to the wild after spending a month in a rehabilitation center.

The bear cub, which had recovered from injuries caused by a hunter, was relocated to the forest where it was found.

The return to the wild is being done gradually, under the close supervision of veterinarians specialized in wildlife.

**QUESTION 21:**

**Which animal is the main subject in the news you just heard?**

1. **A wild boar.**
2. **A bear cub. [correct]**
3. **A deer.**

**NEWS 22:**

In November, a local police officer saved a swimmer on a beach of Menorca.

In order to save the woman’s life, he did not hesitate to take off his uniform and enter the sea. Along with him, another nearby citizen helped with the rescue.

With both of their assistance and the rescue buoy, the swimmer was successfully brought out of the sea without any physical harm.

**QUESTION 22:**

**On which Balearic island did the event mentioned in the news you just heard take place?**

1. **Palma de Mallorca.**
2. **Menorca. [correct]**
3. **Formentera**

**NEWS 23:**

Last month, a research team found a key molecule in the development of leukemia.

Researchers from the Institute of Biomedicine at the University of Barcelona discovered a new molecule. This particle, involved in the activation of genetic processes, can cause leukemia if it does not function properly.

This discovery has had a significant impact in the scientific world.

**QUESTION 23:**

**At which university was the molecule mentioned in the news you just heard discovered?**

1. **Complutense University of Madrid**
2. **University of Barcelona [correct]**
3. **International University of Valencia.**

**NEWS 24:**

Last Monday, a stranded dolphin was found in a tidal pool in a municipality of Palma de Mallorca.

The residents of Santa Eugenia woke up to this tragic scene on Monday morning. According to the veterinarian who examined the animal, it is believed that the dolphin could have disoriented and ended up on the shore.

As a result, the presence of coast guard has increased in the northwestern area of the island.

**QUESTION 24:**

**Which stranded animal was found in a municipality of Palma de Mallorca, according to the news you just heard?**

1. **A whale.**
2. **A dolphin. [correct]**
3. **A shark.**

**NEWS 25:**

Last Saturday, a town in Granada set a Guinness World Record.

The record for the largest Iberian toast in the world was achieved in Granada. The toast is made with good bread, olive oil and Iberian products.

Many locals and visitors tasted the giant toast for free after the notary verified and certified its validity.

**QUESTION 25:**

**What food set a Guinness World Record in a town in Granada, according to the news you just heard?**

1. **An Iberian toast. [correct]**
2. **A paella.**
3. **An omelet.**

**NEWS 26:**

On Monday, the 5th, Storm Larisa ‘swept’ across the peninsula and set historical records in Spain.

The storm had wind gusts of over 120 kilometers per hour. The State Meteorological Agency declared a weather alert for the entire country, except for Andalusia.

Despite the strong winds, no significant incidents have occurred.

**QUESTION 26:**

**Which autonomous community was not under alert by the State Meteorological Agency, according to the news you just heard?**

1. **Andalusia. [correct]**
2. **Catalonia.**
3. **Galicia.**

**NEWS 27:**

Last November a fake doctor was arrested in a municipality of Pontevedra.

The Civil Guard arrested a 60-year-old man accused of crimes related to forgery of official documents and professional intrusion. The arrested individual already had a criminal record for similar offenses in other autonomous communities.

For now, he has been released on provisional bail pending trial.

**QUESTION 27:**

1. **Cordoba.**
2. **Pontevedra. [correct]**
3. **Cartagena.**

**NEWS 28:**

Last Wednesday, the Cemetery of Cantabria received the award for the best environmental initiative in the country.

This municipal cemetery won first place in the 2022 Spanish Cemeteries Competition. The decision recognized its alignment with the Environmental Strategy to address the challenge of Climate Change.

In response to this award, the Cemetery of Bilbao is already preparing to compete in another category.

**QUESTION 28**

**Which Cemetery won the first place in the 2022 Spanish Cemeteries Competition, according to the news you just heard?**

1. **The Municipal Cemetery of Andalusia.**
2. **The Municipal Cemetery of Catalonia.**
3. **The Municipal Cemetery of Cantabria. [correct].**

**NEWS 29:**

In December, a research team discovered that oral health was better in the Paleolithic.

The tartar found on the teeth of prehistoric humans has allowed researchers to learn about their diet, the bacteria in their mouths, and also their oral health.

On the other hand, the results indicate that oral diseases were more common in the Neolithic than in the Paleolithic.

**QUESTION 29:**

**What area of health was studied in the research you just heard about?**

1. **Mental health.**
2. **Gynecological health.**
3. **Oral health. [correct]**

**NEWS 30:**

On Monday, a man was arrested for killing his wife and her daughter.

The lifeless bodies of the woman and her daughter were found in their shared home. Alongside them, the alleged perpetrator was found severely injured after attempting to take his own life.

The suspect was treated and transported to Jerez Hospital. He is currently out of danger.

**QUESTION 30:**

**Who is the alleged murderer of a woman and her daughter, according to the news you just heard?**

1. **Her brother.**
2. **Her partner. [correct]**
3. **A family friend.**

**NEWS 31:**

Last week, a cheese-making training session took place in Galicia.

The Vigo City Council conducted a goat milk cheese-making workshop last Monday. Its purpose is to improve the general ranching skills of the so-called “new farmers”.

This training initiative is part of the course program offered by the Department of Agriculture, Ranching and Fisheries.

**QUESTION 31:**

**In which autonomous community does the news you just heard take place?**

1. **Galicia. [correct]**
2. **Cantabria.**
3. **Vasque Country.**

**NEWS 32:**

Last December, the excavation of a mass grave began, where seven Galician men were buried.

The location of their burial remained unknown until the Historical Memory Committee made the war records public. The University of Pontevedra will coordinate the excavations in order to proceed with the exhumation.

This has led to the beginning of excavations in other mass graves believed to contain more buried individuals.

**QUESTION 32:**

**How many Galician men were buried in a mass grave, according to the news you just heard?**

1. **7. [correct]**
2. **10.**
3. **5.**

**NEWS 33:**

Last Thursday, a man was injured after a slab from a façade fell on him in Barcelona.

The 35-year-old man is in serious condition, while his wife has required assistance from psychologists. Traffic was regulated by the Municipal Police shortly after the accident.

The victim was transported to the hospital with severe traumatic brain injury.

**QUESTION 33:**

**What fell on the principal subject of the news you just heard?**

1. **A flowerpot.**
2. **A slab. [correct]**
3. **A stone from the façade.**

**NEWS 34:**

On Friday, a Civil Guard dog detected a woman smuggling drugs into a prison in Seville.

The incident occurred when the animal pointed a woman who was about to meet her imprisoned son. Upon the arrival of the officers, the suspect admitted to carrying various drugs hidden on her body.

The woman was arrested on charges of a crime against public health.

**QUESTION 34:**

**According to the news you just heard, who discovered a woman smuggling drugs into a prison in Seville?**

1. **A Civil Guard.**
2. **A Civil Guard dog. [correct]**
3. **A citizen.**

**NEWS 35:**

In 2016, a mother kicked her minor daughter out of the house and is now sentenced to one year in prison.

The sentence, which condemns her as the perpetrator of a crime of child abandonment, confirms that the woman had custody of the child.

After this sentence, the woman continues denying her involvement in the crime of abandonment.

**QUESTION 35:**

**For which crimes has a mother been sentenced, according to the news you just heard?**

1. **Crime of abandonment. [correct]**
2. **Crime of theft.**
3. **Crime of fraud.**

**NEWS 36:**

Last month, a large number of healthcare professionals were hired to deal with the increasing number of childhood bronchitis in Murcia.

The Region of Murcia authorized the hiring of healthcare professionals to act as reinforcements in response to the rise in bronchitis in the area.

This measure will involve the addition of various healthcare workers, thus improving the quality of medical care.

**QUESTION 36:**

**What virus is mentioned in the news you just heard?**

1. **Bronchitis. [correct]**
2. **Influenza.**
3. **Covid-19.**

**NEWS 37:**

Las Wednesday, a gang of thieves stole millions of euros of computers from the HP company.

Several individuals gained access to the warehouse in the industrial park and stole computers worth nearly two million euros. Two of the vehicles used in the robbery have been recovered by the National Police.

The identity of the thieves is still unknown.

**QUESTION 37:**

**According to the news you just heard, what branch is the company that was robbed?**

1. **Samsung.**
2. **Apple.**
3. **HP. [correct]**

**NEWS 38:**

Last March a center destined to help families in need was opened in Jaen.

The Social Services will be available to residents starting in April and will be divided into two buildings: one for social assistance and another for seniors.

It will address basic needs related to autonomy, well-being and dignified living.

**QUESTION 38:**

**According to the news you just heard, in which autonomous community was a Social Service center opened?**

1. **Jaen. [correct]**
2. **Catalonia.**
3. **Cantabria.**

**NEWS 39:**

On April 4th, a lightning strike killed two swimmers on a beach in northern Galicia.

At 16:00, the State Meteorological Agency had issued a yellow alert warning for “very intense storms”. The lightning struck among the swimmers who were in the water at that moment.

The victims, an Italian man and a German tourist, were killed instantly.

**QUESTION 39:**

**According to the news you just heard, what killed two swimmers in a Galician beach?**

1. **A lightning strike. [correct]**
2. **A demolition.**
3. **A sea scooter.**

**NEWS 40:**

Last Saturday, Maritime Rescue rescued a man who was paddle surfing on a beach in Santander.

The strong currents and winds prevented the man from reaching the shore. Maritime Rescue received the alert and immediately began the appropriate action.

This rescue unit took the opportunity to remind that practicing water sports is not without risks.

**QUESTION 40:**

**What water sport is mentioned in the news you just heard?**

1. **Surfing**
2. **Paddle surfing. [correct]**
3. **Windsurfing**
